# Supplementary material for: Reporting Real-World Data on Prostate Cancer Treatment Outcomes to Consumers: The Prostate Cancer Report Card
Source: Hindawi journal article supplement (doi:10.1155/2023/6660371), 2023-10-13
Supplement: f1 [file 6660371.f1.zip]

Archive with 2 entries (2 files):
- Online_Survey_Questions.pdf
- Qualitative_Interview_Questions.pdf
