# Supplementary material for: Reporting Real-World Data on Prostate Cancer Treatment Outcomes to Consumers: The Prostate Cancer Report Card
Source: Hindawi journal article supplement (doi:10.1155/2023/6660371), 2023-10-13
Supplement: f1 [file 6660371.f1.zip]

# Prostate Cancer Outcomes Report Card

## Feedback survey

You must be **18 or older** to participate in this study.

Participation in this study is **voluntary**.

Filling the survey will take approximately 15 minutes.

Your responses will be **confidential** and identifying information such as your name or email address will not be collected.

If you have any questions about this study, please email us to (email provided here).

**By completing this survey, you are consenting to participate in this study.**

This project has been approved by the University of South Australia's Human Research Ethics Committee (No. 204570) and Southern Adelaide Clinical Human Research Ethics Committee (LNR/22/SAC/102). If you have any ethical concerns about the project or questions about your rights as a participant, please contact UniSA HREC Officer, Tel: ---; Email: (email provided here) or Southern Adelaide Clinical HREC, ---; email: (email provided here).

Please ensure that you have reviewed the "Report Card" before completing this survey.

You are welcome to look over the report card at any time while completing these questions.

Please click the link below to open the report card!

{link provided here}

***Information about you:***

Are you

- ☐ Male
- ☐ Female
- ☐ Prefer not to say

Which age group are you in?

- ☐ <40 years
- ☐ 40-49 years
- ☐ 50-59 years
- ☐ 60-69 years
- ☐ 70-79 years
- ☐ 80+ years

Which best describes you

- ☐ I have been diagnosed prostate cancer
- ☐ I am a partner/family member of someone with prostate cancer
- ☐ I am a health care professional
- ☐ Other \_\_\_\_\_

If you or your loved one has had prostate cancer, how long ago was the diagnosis? (if not sure, please provide your best guess)

|  |
|--|
|  |
|--|

What was your/their main initial treatment?

- ☐ Surgery (radical prostatectomy)
- ☐ Radiotherapy (including brachytherapy – seed implants)
- ☐ Hormone therapy
- ☐ Active Surveillance
- ☐ Watch and Wait
- ☐ Other \_\_\_\_\_
- ☐ Not applicable

### ***Feedback on the report card***

***Please indicate how strongly you agree or disagree with the following statements***

| <b>Content:</b>                                                               | <b>Strongly disagree</b> | <b>Disagree</b>          | <b>Neutral</b>           | <b>Agree</b>             | <b>Strongly agree</b>    |
|-------------------------------------------------------------------------------|--------------------------|--------------------------|--------------------------|--------------------------|--------------------------|
| The report card addresses topics that readers might want to know about        | <input type="checkbox"/> |
| The type of information in the report card is appropriate                     | <input type="checkbox"/> |
| The amount of information is about right                                      | <input type="checkbox"/> |
| The information in the report card is not too complex                         | <input type="checkbox"/> |
| I trust the information in the report card                                    | <input type="checkbox"/> |
| There is enough information about where to get further support or information | <input type="checkbox"/> |

What did you like most about the report card?

What did not like about the report card?

*Please add any comments on the content of the report card*

| Readability:                                             | Strongly disagree        | Disagree                 | Neutral                  | Agree                    | Strongly agree           |
|----------------------------------------------------------|--------------------------|--------------------------|--------------------------|--------------------------|--------------------------|
| Information is presented in common everyday language     | <input type="checkbox"/> |
| Medical terms are clearly explained                      | <input type="checkbox"/> |
| The report card is written in a friendly way             | <input type="checkbox"/> |
| The report card is easy to read                          | <input type="checkbox"/> |
| It is easy to understand what all the numbers mean       | <input type="checkbox"/> |
| Enough explanation of the different outcomes is provided | <input type="checkbox"/> |

Was there any information that you did not understand?

*Please add any comments on the readability of the report card*

| Visual presentation:                                                          | Strongly disagree        | Disagree                 | Neutral                  | Agree                    | Strongly agree           |
|-------------------------------------------------------------------------------|--------------------------|--------------------------|--------------------------|--------------------------|--------------------------|
| The report card is organised in a way that was easy to follow                 | <input type="checkbox"/> |
| The way the information is displayed makes the report card easy to understand | <input type="checkbox"/> |
| Visual graphics are easy to understand                                        | <input type="checkbox"/> |
| The report card attracted my attention                                        | <input type="checkbox"/> |
| The overall look of the report card is appealing                              | <input type="checkbox"/> |

*Please add any comments on the visual presentation of the report card*

| Relevance                                                                                         | Strongly disagree        | Disagree                 | Neutral                  | Agree                    | Strongly agree           |
|---------------------------------------------------------------------------------------------------|--------------------------|--------------------------|--------------------------|--------------------------|--------------------------|
| The content is relevant for men who have just been diagnosed with prostate cancer                 | <input type="checkbox"/> |
| The content is relevant for partners, family, friends of someone with prostate cancer             | <input type="checkbox"/> |
| The report card is interesting to people not affected by prostate cancer                          | <input type="checkbox"/> |
| I would send this report card to a family member if they needed information about prostate cancer | <input type="checkbox"/> |

*Please add any comments on the relevance of the report card*

**Open ended questions:**

Does any information in the report card make you feel anxious or concerned?

Is any important information missing from the report card?

What other changes could be made to improve the report card?

Please feel free to add any other comments

## **Thank you for completing this survey**

For information or support on prostate cancer, please contact the Cancer Help Line

13 11 20 (operates 9am- 5 pm Monday-Friday).

If you would like to see a summary of the results of this survey or the final report card, please contact us via email (email provided here).
