# Supplementary material for: Reporting Real-World Data on Prostate Cancer Treatment Outcomes to Consumers: The Prostate Cancer Report Card
Source: Hindawi journal article supplement (doi:10.1155/2023/6660371), 2023-10-13
Supplement: f1 [file 6660371.f1.zip › Qualitative_Interview_Questions.pdf]

## Interview guide for the research project: Assessing the acceptability of a draft 'Prostate Cancer Outcomes Report Card' for consumers.

Hello, I am XXXXXX, one of the researchers from the university of South Australia working on this project. Thank you for volunteering to participate in this interview.

- Is it still a good time to interview you? (if not, arrange another time).

Just to remind you, the aim of this research is to gather feedback from you about the 'Report Card' that has been sent to you. This 'Report Card' is about outcomes after different prostate cancer treatments among South Australian men. In this discussion, you will be asked to talk about the Report Card from your own perspective, experiences, and opinions.

Remember that you don't have to answer any question if you don't want to, and you are free to end the interview at any time.

- Do you have any questions before we begin?
- Are you still happy for this interview to be recorded?

The tape-recorder is now switched on. It is the [date] at [time].

I would just like to start with some general questions about you:

- How old are you?
- How you identify yourself (male/female/other)? (optional)
- What experience do you have with prostate cancer?
  - diagnosed with prostate cancer, partner or a family member?
  - How long ago was your/ their diagnosis?
  - What was the main type of treatment?
- Thinking back to the time when you received your diagnosis, what information was or would have been helpful regarding different prostate cancer treatments?
- Where did you get most of your information about prostate cancer?

Now I'm going to ask you some questions about the report card we sent you.

- What was your **first impression** of it?
- Are there any things **you like about** the report card?

- Are there any things **you dislike about** the report card?
- What did you think about the **way the information was presented**? Were you able to read it or were there problems **reading** it?
- How **interesting /relevant** did you find the information in the report card?
- In your opinion, would the report card be **useful or relevant to men** who have been diagnosed recently with prostate cancer? Why/why not? (Possible prompt: Would it have been relevant for you?)
- How **easy was it to understand** the information? (Prompt if necessary: written? Graphs or figures?)
- Was there any specific information that you **did not understand**?  
-What would have helped you to understand this better?
- Did any information in the report card make you **feel anxious or concerned** or might make other people anxious?
- Is there any important **information missing** from the report card that should be included?
- Is there any information in the report card you think **should be removed**?
- Are there any **changes you think we should make to improve** the report card?

That is the end of our questions.

- Is there anything else that you would like to add?

Thank you for taking the time to help us.

We really appreciate your kind cooperation and participation. We will turn off the audio recorder now.
